# Supplementary material for: What controls the seasonal cycle of columnar methane observed by GOSAT over different regions in India?
Source: Copernicus journal article supplement (doi:10.5194/acp-17-12633-2017), 2017-10-24
Supplement: Supplementary file 1 [file acp-17-12633-2017-supplement.zip]

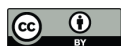

## *Supplement of*

# **What controls the seasonal cycle of columnar methane observed by GOSAT over different regions in India?**

**N. Chandra et al.**

*Correspondence to:* Naveen Chandra (nav.phy09@gmail.com)

- [acp-17-12633-2017-supplement-title-page.pdf](#)
- [GOSAT\\_ACTM\\_ms\\_sup.docx](#)

The copyright of individual parts of the supplement might differ from the CC BY 3.0 License.
